# Supplementary material for: Genetic interactions among Brca1, Brca2, Palb2, and Trp53 in mammary tumor development
Source: NPJ Breast Cancer. 2021 Apr 23;7:45. doi: 10.1038/s41523-021-00253-5 (PMC8065161; doi:10.1038/s41523-021-00253-5)
Supplement: Supplementary file 1 — Supplementary Data 1 [file 41523_2021_253_MOESM1_ESM.xlsx]

## Sheet: Summary table
Supplementary Data 1. Summary of mouse information and results of tumor analyses
	Tag #	Genotype	Latency	Tissue	Histologic review	Tubule	Nuclear grade	Mitosis	Grade	Differenti-ation	Necrosis	WES case #	Trp53	Brca1	Palb2	Brca2	Deletion confirmation
1	C483	Trp53F/W	404	Lymphoma
2	C405	Trp53F/W	589	Thymic lymphoma; Colon tumor; Kidney nodule.
3	C292	Trp53F/W	589	Lymphoma, Pleural effusion
4	C301	Trp53F/W	623	Liver tumor													PCR
5	C404	Trp53F/W	639	Lung tumor; Pancreatic tumor													PCR
6	C251	Trp53F/W	651	Lung tumor
7	C252	Trp53F/W	651	Pancreatic tumor
8	C159	Trp53F/W	658	Skin tumor
9	C247	Trp53F/W	692	Biliary atresia
10	C293	Trp53F/W	708	Head nodule
11	C291	Trp53F/W	743	Lung tumor, Uterus tumor
12	C294	Trp53F/W	750	Lung tumor													PCR
13	C300	Trp53F/W	789	Pancreatic tumor; Ovary tumor													PCR
14	C248	Trp53F/W	854	Ovarian tumor; Thymic lymphoma
15	C241	Trp53F/W	856	Lung tumor; Pancreatic tumor													PCR
16	C164	Trp53F/W	873	Lung nodule; Liver nodule
17	C184	Trp53F/W	873	Pancreatic tumor; Bladder tumor
18	C160	Trp53F/W	889	Cystic mammary gland
19	C295	Trp53F/W	904	Head tumor
20	C290	Trp53F/W	906	Liver tumor; Lymphoma
21	C484	Trp53F/W	671	Liver tumor
1	C271	B1F/F;Trp53F/W	263	Mammary tumor	IDC with focal metaplasic features (spindle, matrix producing, squamous)	3	3	3	9	Poorly diff	Moderate	XB02	-	-	+	+
2	C324	B1F/F;Trp53F/W	299	Mammary tumor	IDC NST	3	3	3	9	Poorly diff	Focal
3	C270	B1F/F;Trp53F/W	301	Mammary tumor	IDC NST	3	3	3	9	Poorly diff	Focal	XB47	-	-	+	+
4	C268	B1F/F;Trp53F/W	331	Mammary tumor	IDC with focal metaplasic features (spindle, squamous, matrix producing)	3	3	3	9	Poorly diff	Moderate	XB01	-	-	+	+
5	C272	B1F/F;Trp53F/W	350	Mammary tumor	IDC NST	3	3	3	9	Poorly diff	Extensive	XB31	-	-	+	+
6	C378	B1F/F;Trp53F/W	378	Mammary tumor	IDC with focal metaplastic features (squamous)	3	3	3	9	Poorly diff	Focal	XB04	-	-	+	+
7	C376	B1F/F;Trp53F/W	406	Mammary tumor
8	C368	B1F/F;Trp53F/W	463	Mammary tumor	IDC NST	3	3	3	9	Poorly diff	Focal
9	C195	B1F/F;Trp53F/W	829	Mammary tumor	Metaplastic carcinoma (spindle)	3	3	3	9	Poorly diff	Moderate
10	C269	B1F/F;Trp53F/W	849	Mammary tumor	IDC NST	3	3	3	9	Poorly diff	Focal
11	C735	B1F/F;Trp53F/W	574	Thymic lymphoma; Pancreatic tumor; Hydrohystera
12	C662	B1F/F;Trp53F/W	589	Thymic lymphoma; milky ascites													PCR
13	C367	B1F/F;Trp53F/W	765	Lymphoma; MG lymphonode; hydrohystera
14	C202	B1F/F;Trp53F/W	928	Thymic lymphoma; lymphoma; hydrohystera;													PCR
15	C346	B1F/F;Trp53F/W	620	Skin tumor
16	C198	B1F/F;Trp53F/W	649	Pancreatic tumor	Squamous cell carcinoma (at least in situ)					Moderately diff	Absent
17	C260	B1F/F;Trp53F/W	673	Stomach tumor
18	C201	B1F/F;Trp53F/W	970	Stomach tumor													PCR
22	C322	B1F/F;Trp53F/W	672	Colon tumor													PCR
19	C660	B1F/F;Trp53F/W	477	Hydrohystera
20	C262	B1F/F;Trp53F/W	528	Paralysis
21	C200	B1F/F;Trp53F/W	479	No tumor death
23	C194	B1F/F;Trp53F/W	681	No tumor death
24	C261	B1F/F;Trp53F/W	933	No tumor death
1	C285	P2F/F;Trp53F/W	298	Mammary tumor	Metaplastic carcinoma (spindle)	3	3	3	9	Poorly diff	Moderate	XB10	-	+	-	+
3	C360	P2F/F;Trp53F/W	326	Mammary tumor	IDC NST	3	3	2	8	Poorly diff	Moderate
4	C394	P2F/F;Trp53F/W	329	Mammary tumor	Metaplastic carcinoma (spindle)	3	3	3	9	Poorly diff	Focal						PCR
5	C393	P2F/F;Trp53F/W	343	Mammary tumor	Metaplastic carcinoma (squamous and osseous)	3	3	3	9	Poorly diff	Extensive
6	C355	P2F/F;Trp53F/W	354	Mammary tumor	IDC NST	3	3	3	9	Poorly diff	Absent						PCR
7	C442	P2F/F;Trp53F/W	384	Mammary tumor	Metaplastic carcinoma (spindle)	3	3	3	9	Poorly diff	Focal						PCR
2	C432	P2F/F;Trp53F/W	395	Mammary tumor	Metaplastic carcinoma (spindle)	3	3	3	9	Poorly diff	Focal	XB07	-	+	-	+
8	C434	P2F/F;Trp53F/W	398	Mammary tumor	Metaplastic carcinoma (osseous)	3	3	2	8	Poorly diff	Focal
9	C433	P2F/F;Trp53F/W	437	Mammary tumor	IDC NST	3	3	2	8	Poorly diff	Extensive						PCR
10	C445	P2F/F;Trp53F/W	442	Mammary tumor	IDC NST	3	3	3	9	Poorly diff	Focal						PCR
11	C351	P2F/F;Trp53F/W	489	Mammary tumor	IDC NST							XB32	-	+	-	+
12	C208	P2F/F;Trp53F/W	499	Mammary tumor	Metaplastic carcinoma (spindle)	3	3	2	8	Poorly diff	Absent						PCR
13	C365	P2F/F;Trp53F/W	547	Mammary tumor	Metaplastic carcinoma (spindle)	3	3	3	9	Poorly diff	Focal						PCR
14	C362	P2F/F;Trp53F/W	571	Mammary tumor	IDC NST	3	3	3	9	Poorly diff	Moderate	XB08	-	+	-	+
15	C395	P2F/F;Trp53F/W	612	Mammary tumor	IDC NST	3	3	2	8	Poorly diff	Focal						PCR
16	C396	P2F/F;Trp53F/W	652	Mammary tumor	IDC NST							XB33	-	+	-	+
17	C364	P2F/F;Trp53F/W	689	Mammary tumor	IDC NST	3	3	3	9	Poorly diff	Extensive						PCR
18	C446	P2F/F;Trp53F/W	692	Mammary tumor	IDC NST	3	3	2	8	Poorly diff	Extensive						PCR
19	C283	P2F/F;Trp53F/W	523	Ovarian tumor; Lymphoma
20	C350	P2F/F;Trp53F/W	608	Ovarian tumor; Anemia													PCR
21	C356	P2F/F;Trp53F/W	551	Liver tumor													PCR
22	C354	P2F/F;Trp53F/W	622	Liver tumor													PCR
23	C427	P2F/F;Trp53F/W	633	Liver tumor; Pancreatic tumor
24	C363	P2F/F;Trp53F/W	759	Lung tumor
25	C443	P2F/F;Trp53F/W	847	Lung tumor													PCR
26	C366	P2F/F;Trp53F/W	614	No tumor death
1	C420	B2F/F;Trp53F/W	309	Mammary tumor	IDC with focal metaplastic features (spindle)	3	3	3	9	Poorly diff	Moderate						PCR
2	C176	B2F/F;Trp53F/W	342	Mammary tumor	Metaplastic carcinoma (spindle)	3	3	3	9	Poorly diff	Moderate	XB34	-	+	+	-
3	C222	B2F/F;Trp53F/W	370	Mammary tumor	IDC NST	3	3	3	9	Poorly diff	Absent						PCR
4	C259	B2F/F;Trp53F/W	382	Mammary tumor	Metaplastic carcinoma (squamous)	3	3	3	9	Poorly diff	Extensive	XB13	-	+	+	-
5	C257	B2F/F;Trp53F/W	522	Mammary tumor	IDC NST	3	3	3	9	Poorly diff	Absent
6	C223	B2F/F;Trp53F/W	538	Mammary tumor	IDC with metaplastic features (spindle)	3	3	3	9	Poorly diff	Moderate						PCR
7	C236	B2F/F;Trp53F/W	583	Mammary tumor	IDC NST	3	3	3	9	Poorly diff	Absent	XB11	-	+	+	-
8	C221	B2F/F;Trp53F/W	659	Mammary tumor	IDC NST	3	3	2	8	Poorly diff	Focal	XB30	-	+	+	-
9	C239	B2F/F;Trp53F/W	785	Mammary tumor	IDC w/ focal metaplastic features	3	3	2	8	Poorly diff	Focal	XB35	-	+	+	-	PCR
10	C240	B2F/F;Trp53F/W	456	Neck tumor	Benign adipose tissue
11	C219	B2F/F;Trp53F/W	524	big belly
12	C220	B2F/F;Trp53F/W	604	Pituitary tumor
13	C178	B2F/F;Trp53F/W	650	Liver tumor													PCR
14	C274	B2F/F;Trp53F/W	651	Lung tumor													PCR
15	C108	B2F/F;Trp53F/W	789	Lung tumor
16	C273	B2F/F;Trp53F/W	802	Lipoma
17	C238	B2F/F;Trp53F/W	827	Thymic lymphoma													PCR
18	C253	B2F/F;Trp53F/W	508	No tumor death
19	C254	B2F/F;Trp53F/W	592	No tumor death
20	C237	B2F/F;Trp53F/W	669	No tumor death
1	P628	B1F/F;P2F/F;Trp53F/W	437	Mammary tumor	IDC w/ focal metaplastic features	3	3	2	8	Poorly diff	Focal	XB19	-	-	-	+
2	C066	B1F/F;P2F/F;Trp53F/W	442	Mammary tumor	IDC w/ focal metaplastic features	3	3	3	9	Poorly diff	Moderate	XB22	-	-	-	+
3	P916	B1F/F;P2F/F;Trp53F/W	477	Mammary tumor	IDC NST	3	3	3	9	Poorly diff	Moderate	XB21	-	-	-	+
4	P524	B1F/F;P2F/F;Trp53F/W	483	Mammary tumor	Metaplastic carcinoma (spindle and rhabdoid)	3	3	3	9	Poorly diff	Extensive						PCR
5	C076	B1F/F;P2F/F;Trp53F/W	494	Mammary tumor	IDC NST	3	3	3	9	Poorly diff	Extensive
6	P629	B1F/F;P2F/F;Trp53F/W	586	Mammary tumor	Metaplastic carcinoma (squamous and spindle)	3	3	3	8	Poorly diff	Extensive	XB39	-	-	-	+
7	P919	B1F/F;P2F/F;Trp53F/W	679	Mammary tumor, lung tumor	IDC NST	3	3	3	9	Poorly diff	Moderate	XB23	-	-	-	+
8	P534	B1F/F;P2F/F;Trp53F/W	771	Mammary tumor	IDC NST	3	3	3	3	Poorly diff	Absent						PCR
9	C073	B1F/F;P2F/F;Trp53F/W	894	Mammary tumor	Metaplastic carcinoma (spindle)	3	3	3	3	Poorly diff	Extensive
10	P529	B1F/F;P2F/F;Trp53F/W	544	Pancreatic tumor
11	C077	B1F/F;P2F/F;Trp53F/W	614	Ovary tumor, colon nodule													PCR
12	C078	B1F/F;P2F/F;Trp53F/W	707	Lymphoma
13	C065	B1F/F;P2F/F;Trp53F/W	715	Liver tumor													PCR
14	P915	B1F/F;P2F/F;Trp53F/W	769	Lung tumor, ovarain tumor, pancreatic tumor													PCR
15	C068	B1F/F;P2F/F;Trp53F/W	776	Liver tumor
16	P630	B1F/F;P2F/F;Trp53F/W	777	Liver tumor
17	P914	B1F/F;P2F/F;Trp53F/W	811	pancreatic tumor; lymphoma
18	P627	B1F/F;P2F/F;Trp53F/W	838	Liver tumor													PCR
19	P640	B1F/F;P2F/F;Trp53F/W	439	no tumor death
20	P662	B1F/F;P2F/F;Trp53F/W	509	no tumor death
21	C118	B1F/F;P2F/F;Trp53F/W	766	no tumor death
22	C067	B1F/F;P2F/F;Trp53F/W	888	no tumor death
1	P558	B1F/F;B2F/F;Trp53F/W	434	Mammary tumor	IDC with metaplastic features (spindle)	3	3	3	9	Poorly diff	Extensive	XB36	-	-	+	-
2	P904	B1F/F;B2F/F;Trp53F/W	514	Mammary tumor	IDC NST	2	3	2	7	Moderately diff	Absent
3	P504	B1F/F;B2F/F;Trp53F/W	517	Mammary tumor	IDC with focal metaplastic features (spindle )	3	3	3	9	Poorly diff	Extensive	XB17	-	-	+	-
4	P902	B1F/F;B2F/F;Trp53F/W	536	Mammary tumor	IDC NST	3	3	3	9	Poorly diff	Focal	XB37	-	-	+	-
5	P905	B1F/F;B2F/F;Trp53F/W	577	Mammary tumor	Metaplastic carcinoma (spindle and chondroid)	3	3	3	9	Poorly diff	Moderate	XB38	-	-	+	-
15	P591	B1F/F;B2F/F;Trp53F/W	598	Mammary tumor	IDC with focal metaplastic features (spindle )	3	3	3	9	Poorly diff	Focal
6	P503	B1F/F;B2F/F;Trp53F/W	629	Mammary tumor	IDC NOS	3	3	3	9	Poorly diff	Moderate	XB16	-	-	+	-
7	P563	B1F/F;B2F/F;Trp53F/W	744	Mammary tumor	Benign												PCR
8	P903	B1F/F;B2F/F;Trp53F/W	472	Eye tumor
9	P541	B1F/F;B2F/F;Trp53F/W	744	Pituitary tumor
10	P499	B1F/F;B2F/F;Trp53F/W	771	Lung tumor
11	C122	B1F/F;B2F/F;Trp53F/W	792	Liver tumor, pancreatic nodule
12	P502	B1F/F;B2F/F;Trp53F/W	1070	small lung nodule, sponge like liver, ascites
13	P500	B1F/F;B2F/F;Trp53F/W	488	anal piles
14	P498	B1F/F;B2F/F;Trp53F/W	458	no tumor death
16	P571	B1F/F;B2F/F;Trp53F/W	633	no tumor death
17	P535	B1F/F;B2F/F;Trp53F/W	648	no tumor death
18	P570	B1F/F;B2F/F;Trp53F/W	663	no tumor death
19	P497	B1F/F;B2F/F;Trp53F/W	719	no tumor death
20	C121	B1F/F;B2F/F;Trp53F/W	1035	no tumor death
1	C598	P2F/F;B2F/F;Trp53F/W	315	Mammary tumor	IDC NST	3	3	3	9	Poorly diff	Extensive
2	C672	P2F/F;B2F/F;Trp53F/W	334	Mammary tumor	IDC NST	3	3	3	9	Poorly diff	Focal	XB26	-	+	-	-
3	C666	P2F/F;B2F/F;Trp53F/W	358	Mammary tumor	IDC NST	3	3	3	9	Poorly diff	Extensive	XB27	-	+	-	-
4	C644	P2F/F;B2F/F;Trp53F/W	369	Mammary tumor, liver tumor	IDC-NST	3	3	2	8	Poorly diff	Extensive
5	C669	P2F/F;B2F/F;Trp53F/W	453	Mammary tumor	IDC-NST	3	3	2	8	Poorly diff	Focal
6	C596	P2F/F;B2F/F;Trp53F/W	561	Mammary tumor
7	C673	P2F/F;B2F/F;Trp53F/W	615	Mammary tumor	IDC with focal metaplastic features	3	3	3	9	Poorly diff	Extensive
8	C663	P2F/F;B2F/F;Trp53F/W	651	Mammary tumor	IDC NST	3	3	2	8	Poorly diff	Focal	XB41	-	+	-	-
9	C614	P2F/F;B2F/F;Trp53F/W	694	Mammary tumor	IDC NST	3	3	2	8	Poorly diff	Focal	XB48	-	+	-	-
10	C642	P2F/F;B2F/F;Trp53F/W	696	Mammary tumor	IDC NST	3	3	2	8	Poorly diff	Focal	XB49	-	+	-	-
11	C645	P2F/F;B2F/F;Trp53F/W	451	Thymic lymphoma	IDC NST	3	3	2	8	Poorly diff	Moderate
12	C641	P2F/F;B2F/F;Trp53F/W	626	Thymic lymphoma	IDC NST	3	3	2	8	Poorly diff	Moderate
13	C671	P2F/F;B2F/F;Trp53F/W	379	Anemia
14	C600	P2F/F;B2F/F;Trp53F/W	652	no tumor death
15	C665	P2F/F;B2F/F;Trp53F/W	717	no tumor death
16	C643	P2F/F;B2F/F;Trp53F/W	737	no tumor death
17	C599	P2F/F;B2F/F;Trp53F/W	>800	Alive at the end of observation
18	C618	P2F/F;B2F/F;Trp53F/W	>800	Alive at the end of observation
19	C668	P2F/F;B2F/F;Trp53F/W	>800	Alive at the end of observation
20	C597	P2F/F;B2F/F;Trp53F/W	>800	Alive at the end of observation
